# Supplementary material
Source: Springer Nature journal article supplement (http://www.springermedizin.de/resource/supplementary/12943_2013_1171_MOESM2_ESM.pdf/9552248)

A

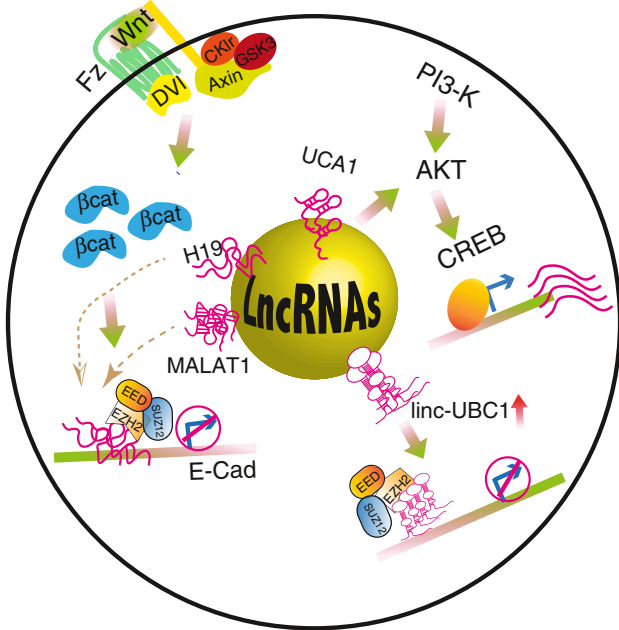

B

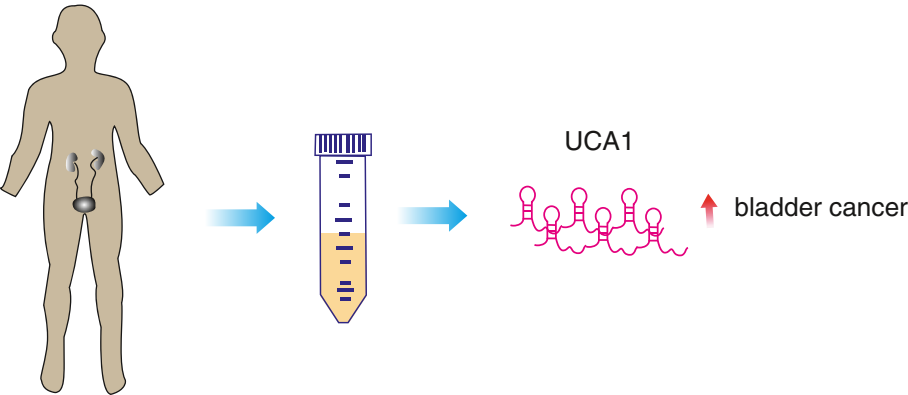

Supplement: MOESM2 [file 9552248]
